# Supplementary material for: 15N-labeled ionic probe attachment mass spectrometry of carbon clusters
Source: Royal Society of Chemistry journal article supplement (doi:10.1039/c0ob00887g), 2011-01-01

# **<sup>15</sup>N-Labeled Ionic Probe Attachment MS for Carbon Clusters**

Fumihiro Ito and Kentaro Yamaguchi\*

Faculty of Pharmaceutical Sciences at Kagawa Campus, Tokushima Bunri University,  
1314-1 Shido, Sanuki, Kagawa 769-2193, Japan.

## **Electronic Supplementary Information**

### **Table Contents**

|                                                                                                            |   |
|------------------------------------------------------------------------------------------------------------|---|
| 1. Multiply charged ionization of fullerene C <sub>60</sub> and C <sub>70</sub> using Sar-TMpybox <b>2</b> | 1 |
| 2. CSI mass spectra of fullerenes having some probes <b>2</b>                                              | 2 |
| 3. <sup>1</sup> H NMR and <sup>13</sup> C NMR spectra of <b>1</b> , <b>2</b> , <b>6 ~ 10</b> and <b>12</b> | 3 |

1. Multiply charged ionization of fullerene C<sub>60</sub>, C<sub>70</sub> and its derivative using Sar-TMpybox **2**

Under N<sub>2</sub>, suspension of **2**, C<sub>60</sub> and benzaldehyde in toluene was stirred at reflux for 24 h. After this reaction mixture was filtered, the filtrate was evaporated *in vacuo*. The residue was washed with Et<sub>2</sub>O. This modified C<sub>60</sub> was added to solution of <sup>14</sup>N or <sup>15</sup>N-**3** in MeCN. After the whole was stirred at room temperature for 2 h, a part of this solution was diluted by MeCN and detected it by CSI-MS.

## 2. CSI mass spectra of fullerene derivatives

### 2-1. C<sub>60</sub> derivatives.

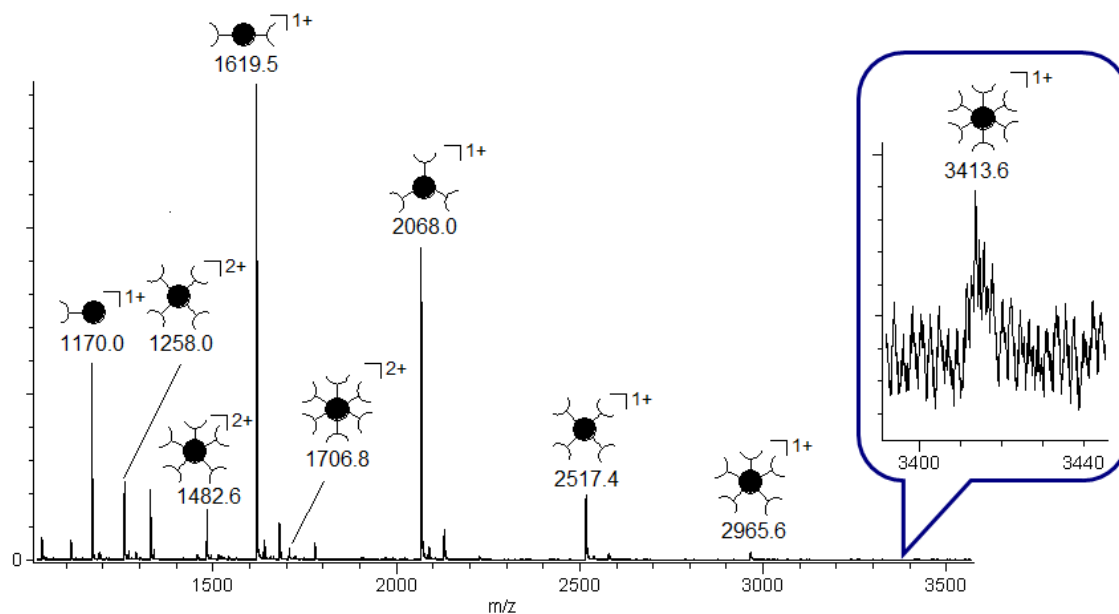

### 2-2. C<sub>70</sub> derivatives.

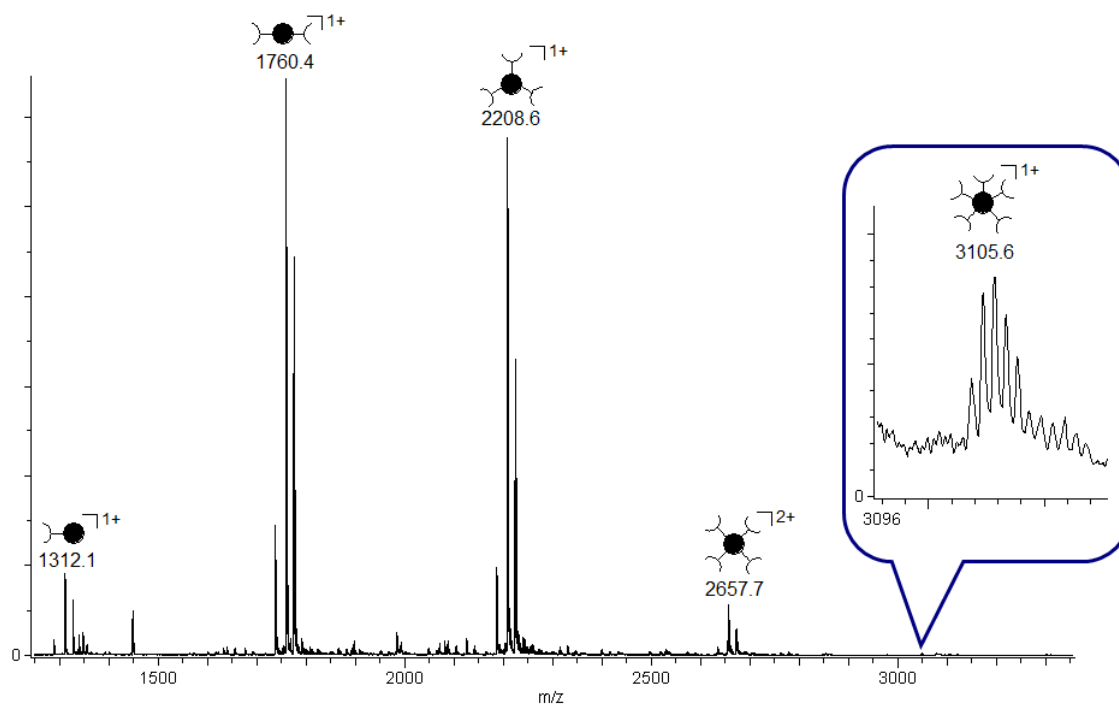

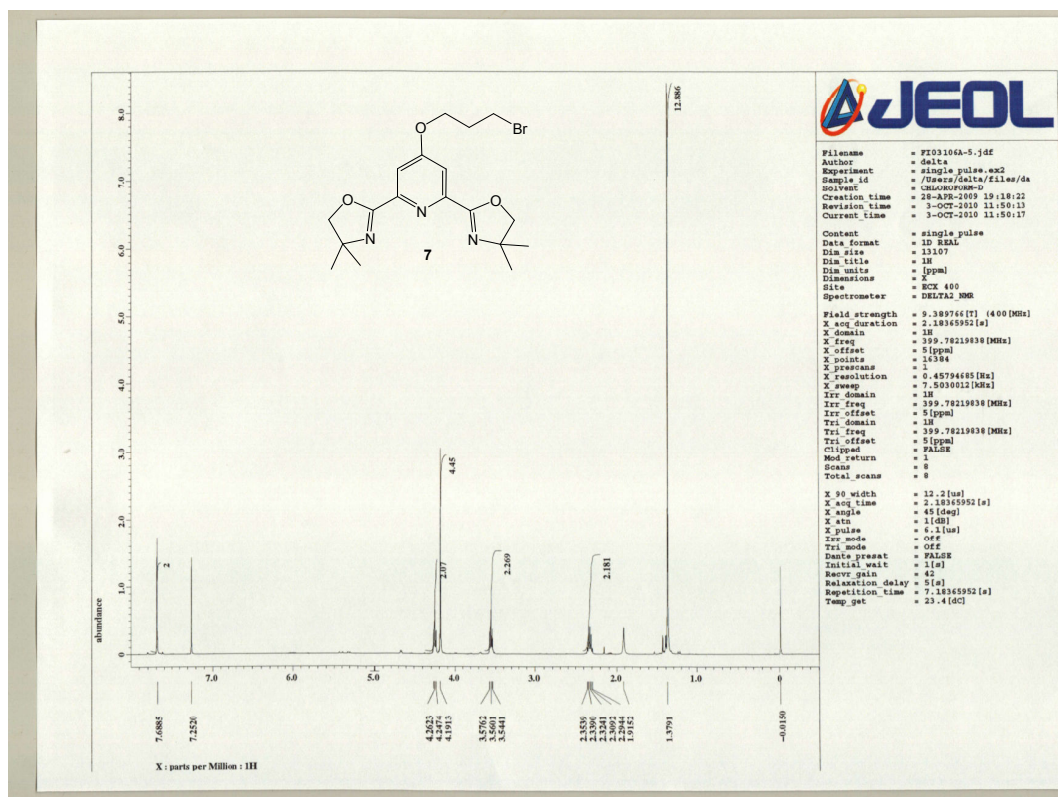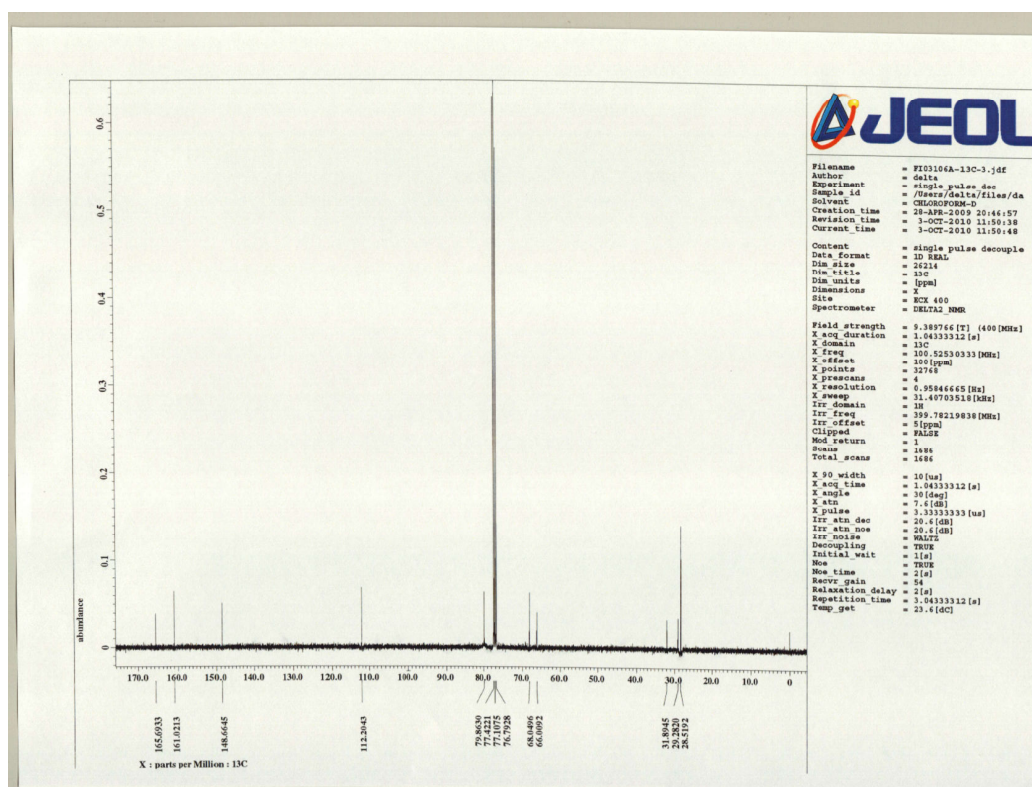



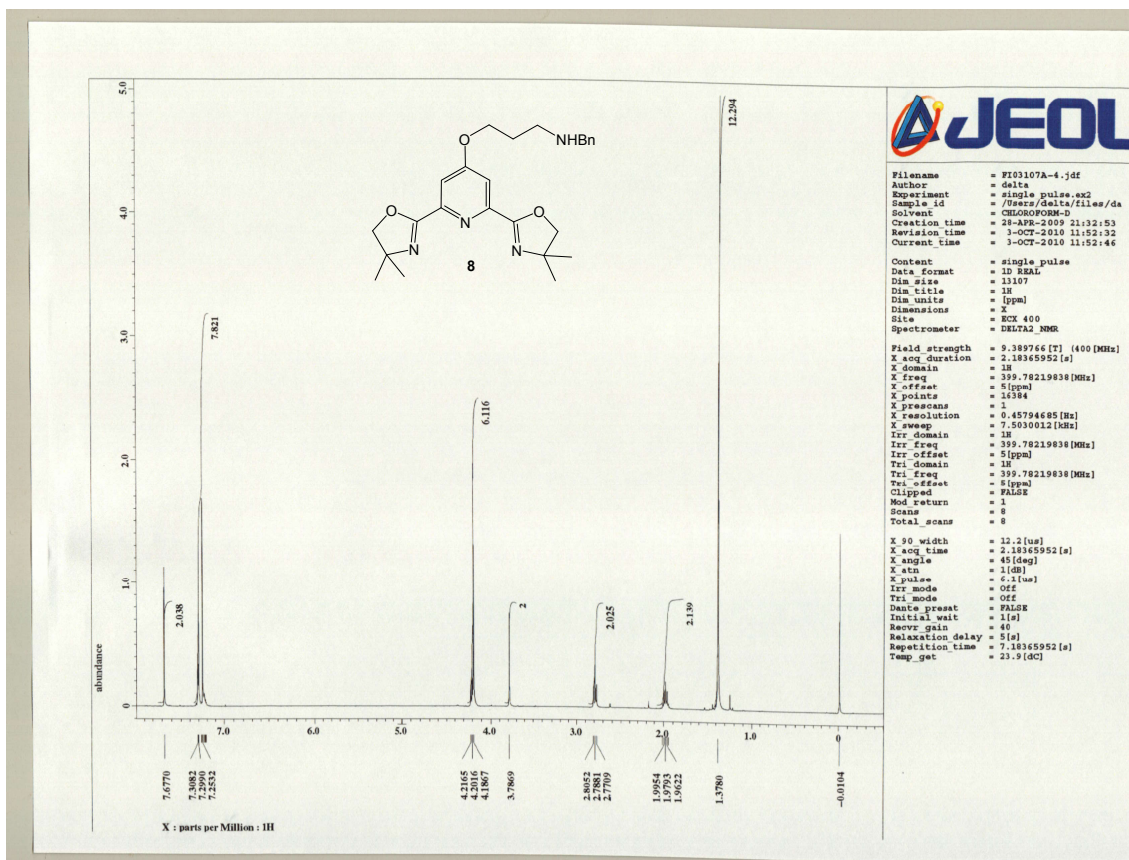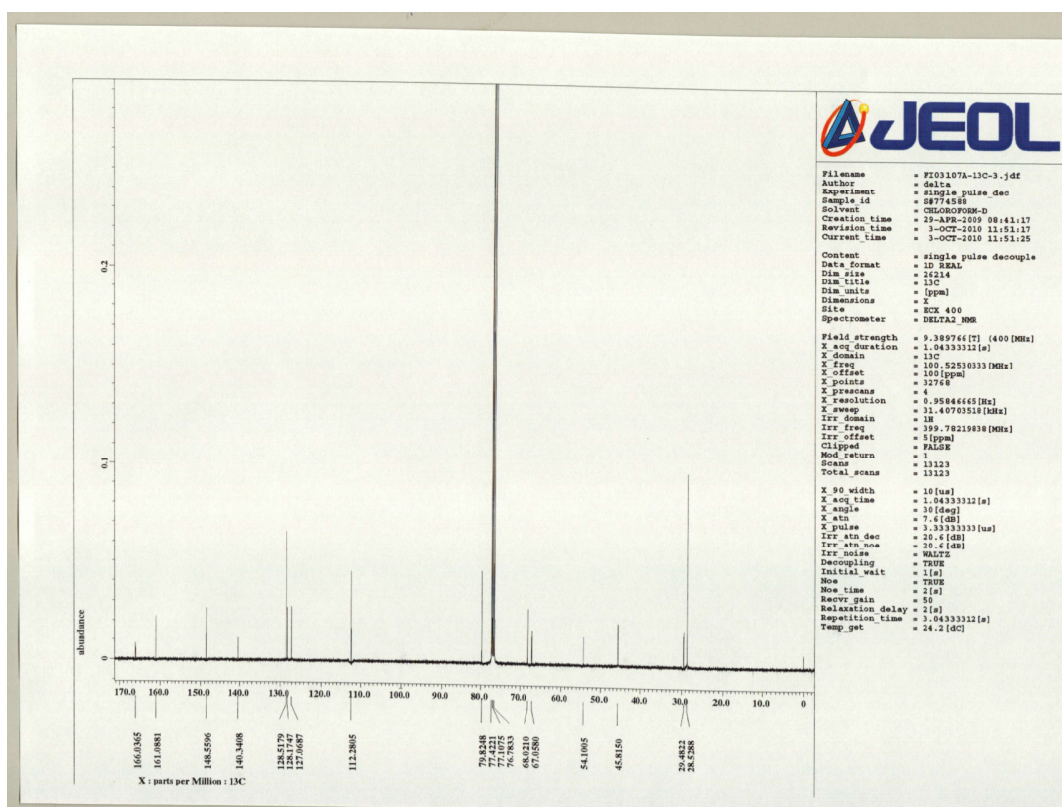



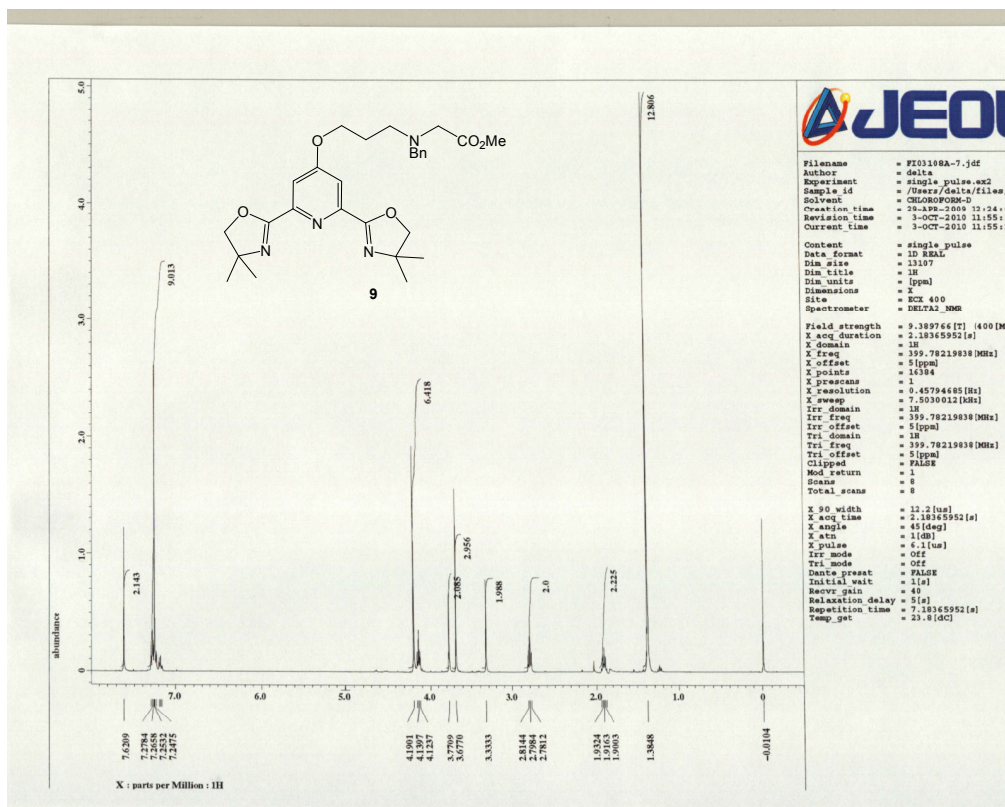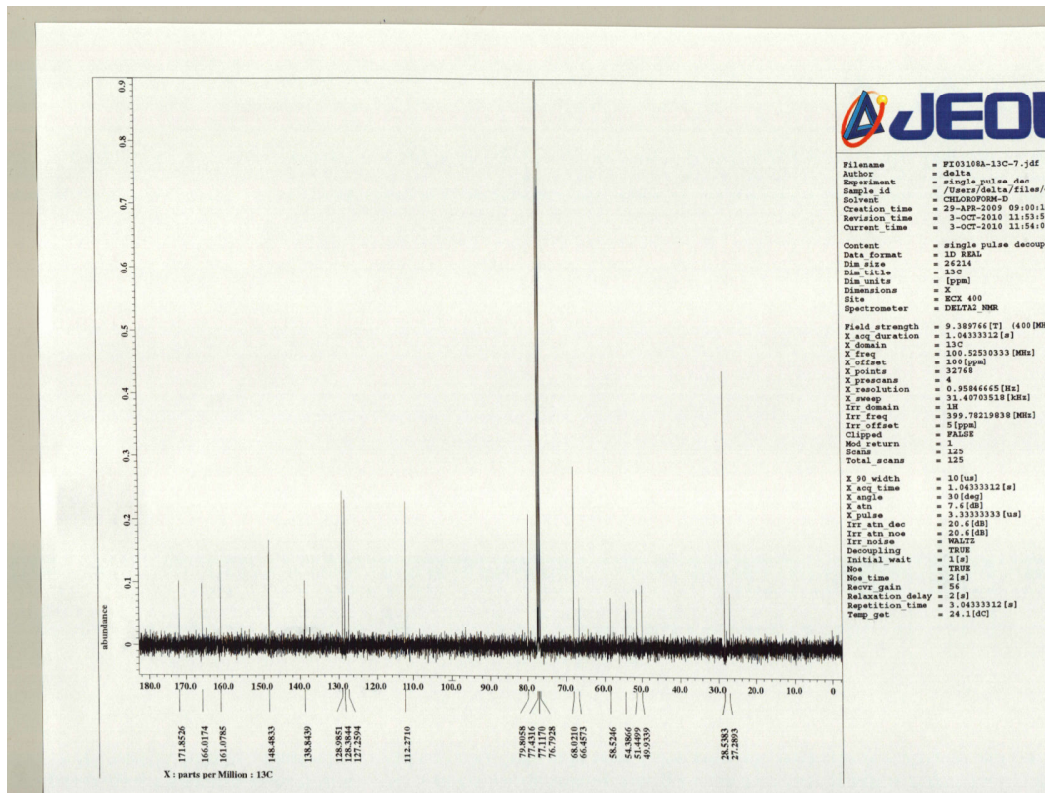

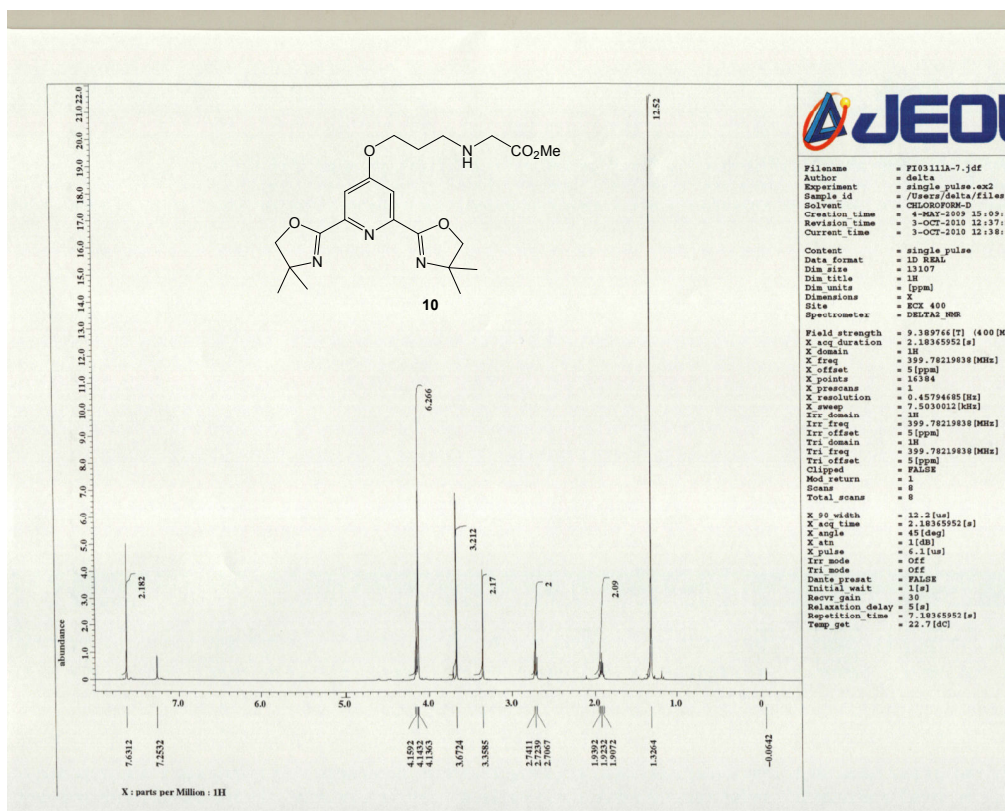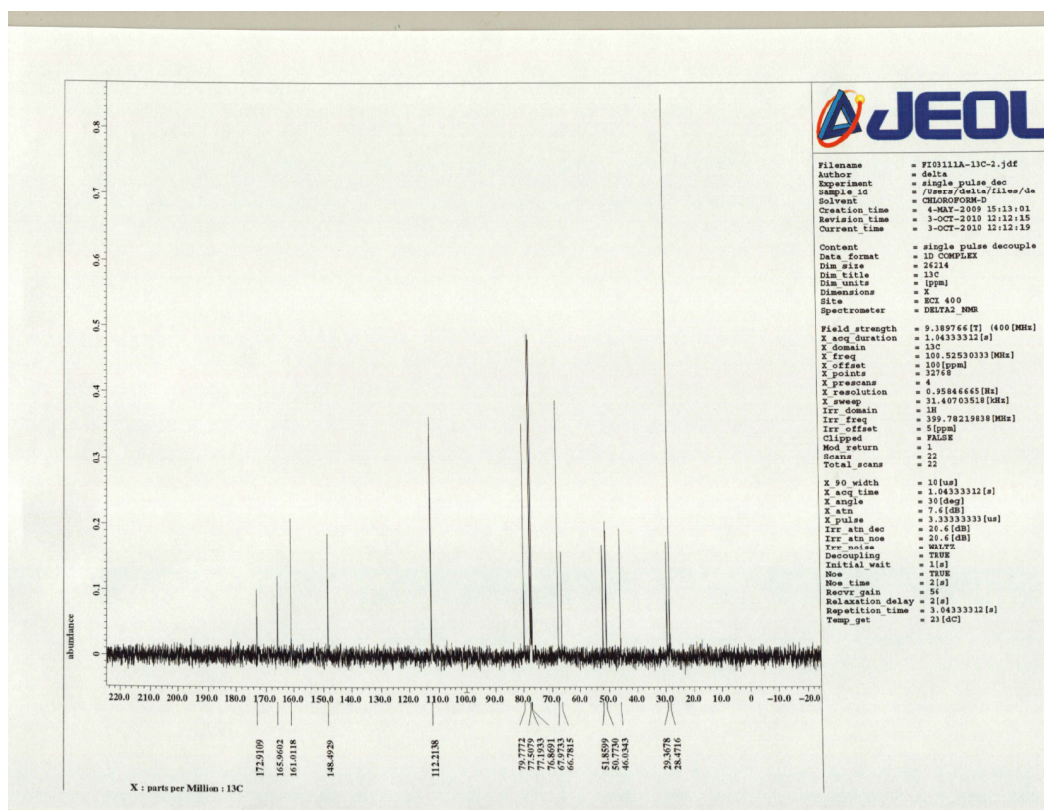



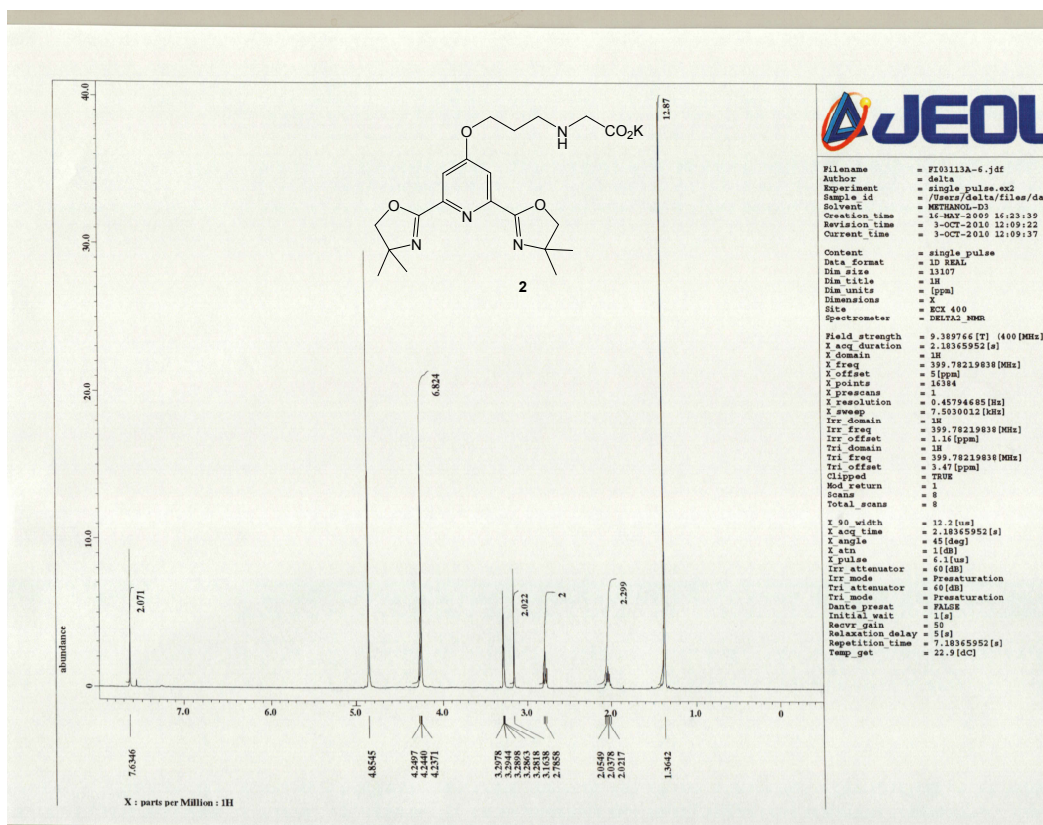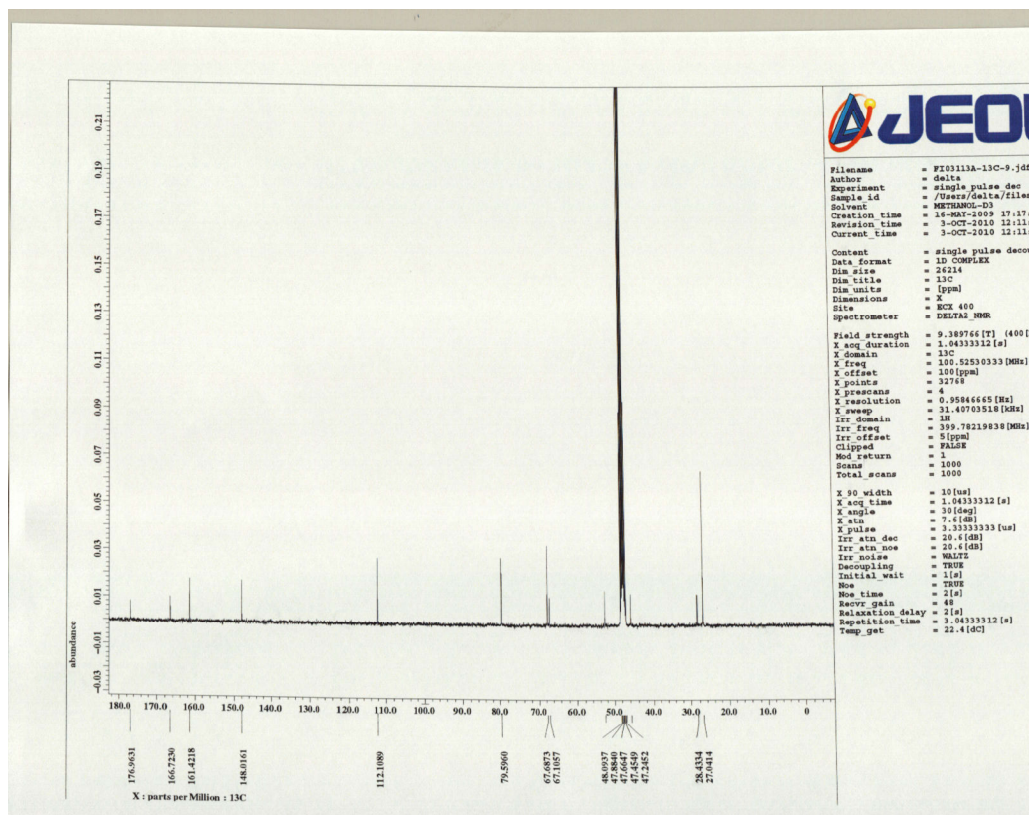



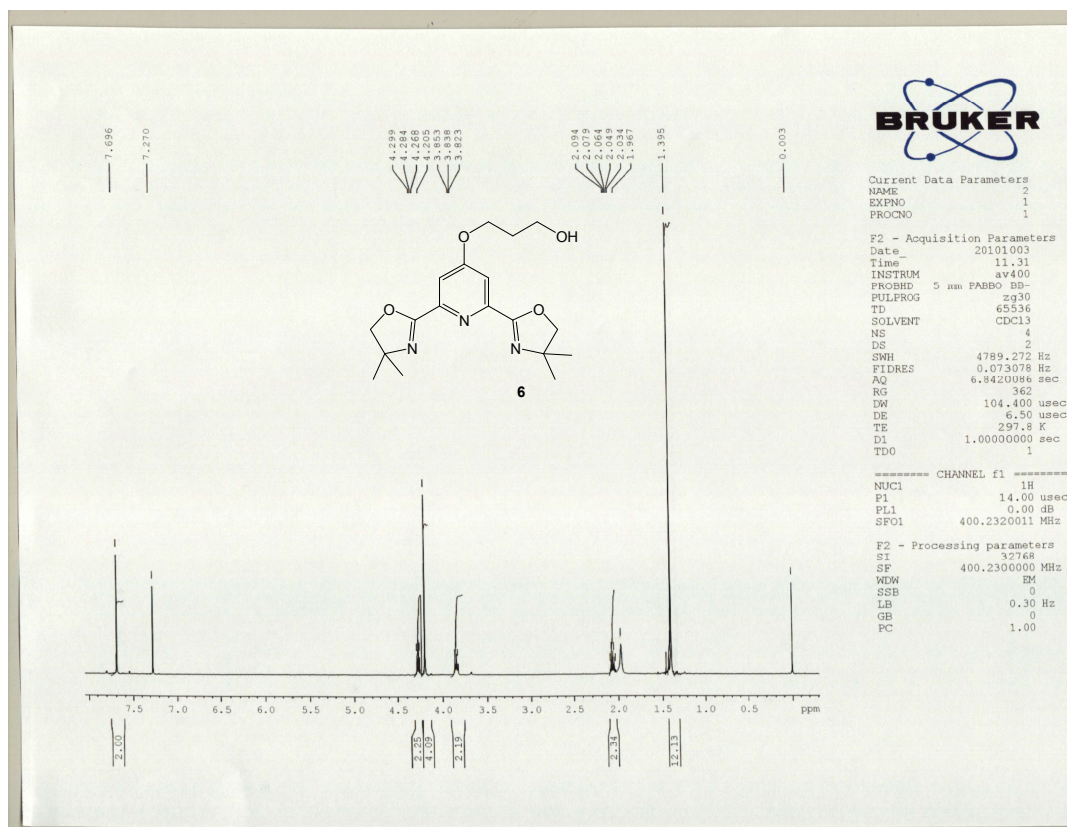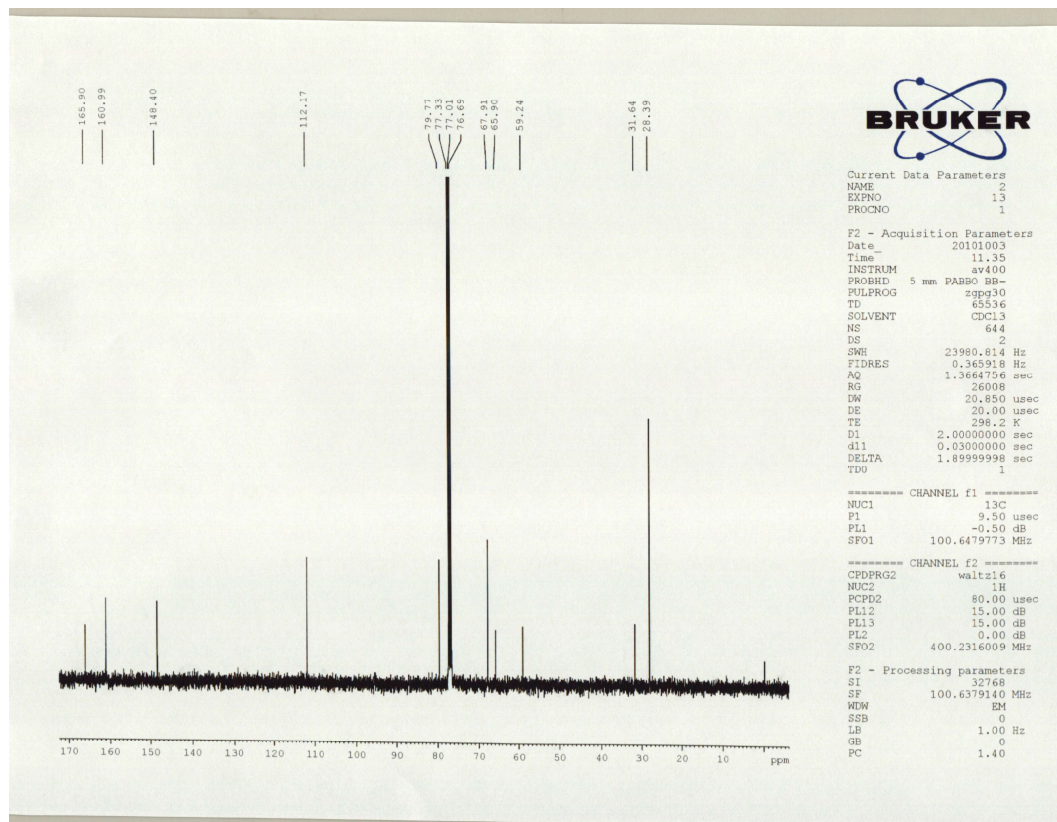

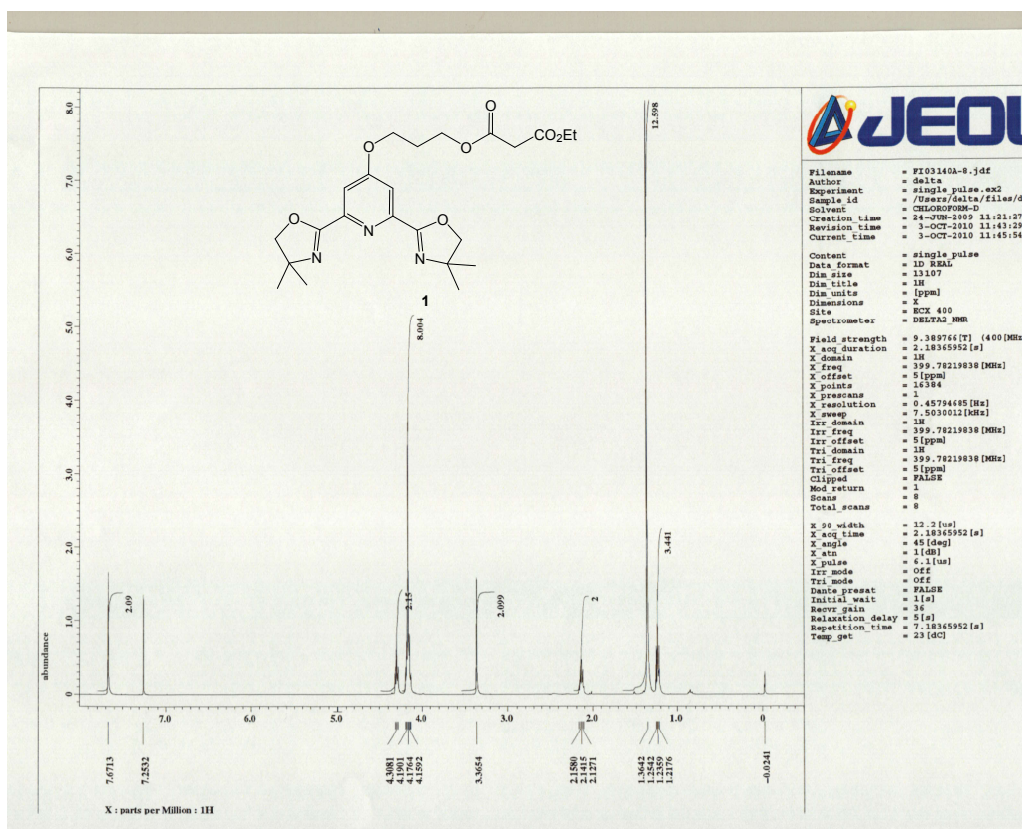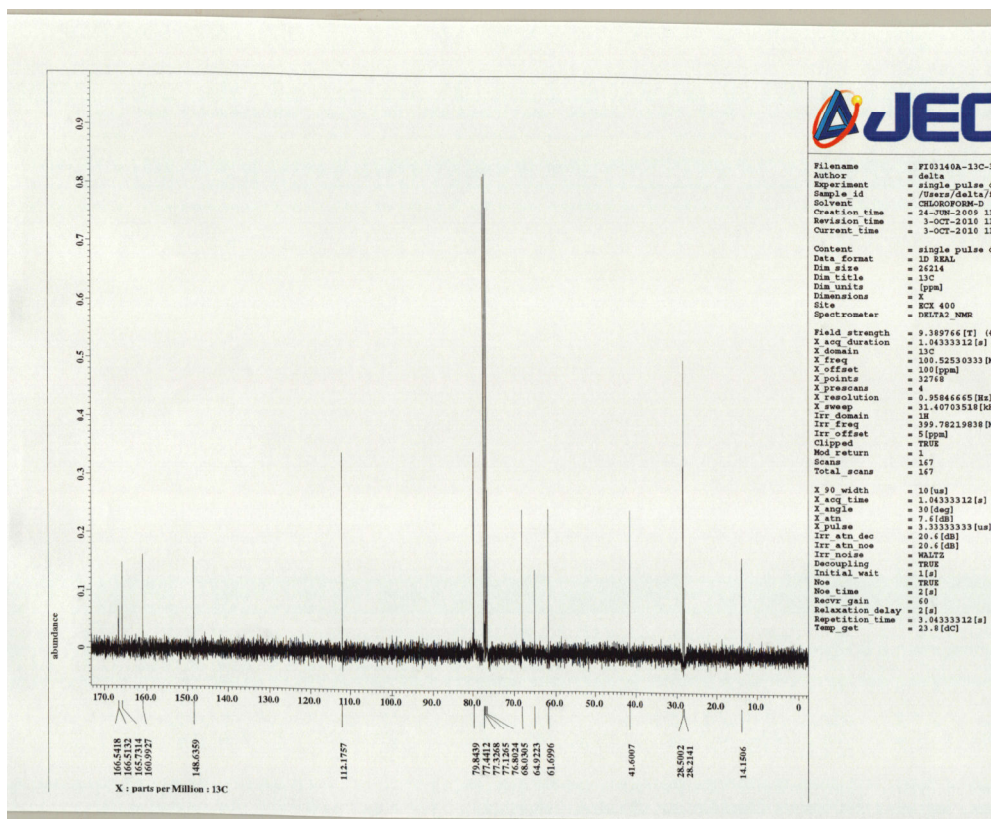



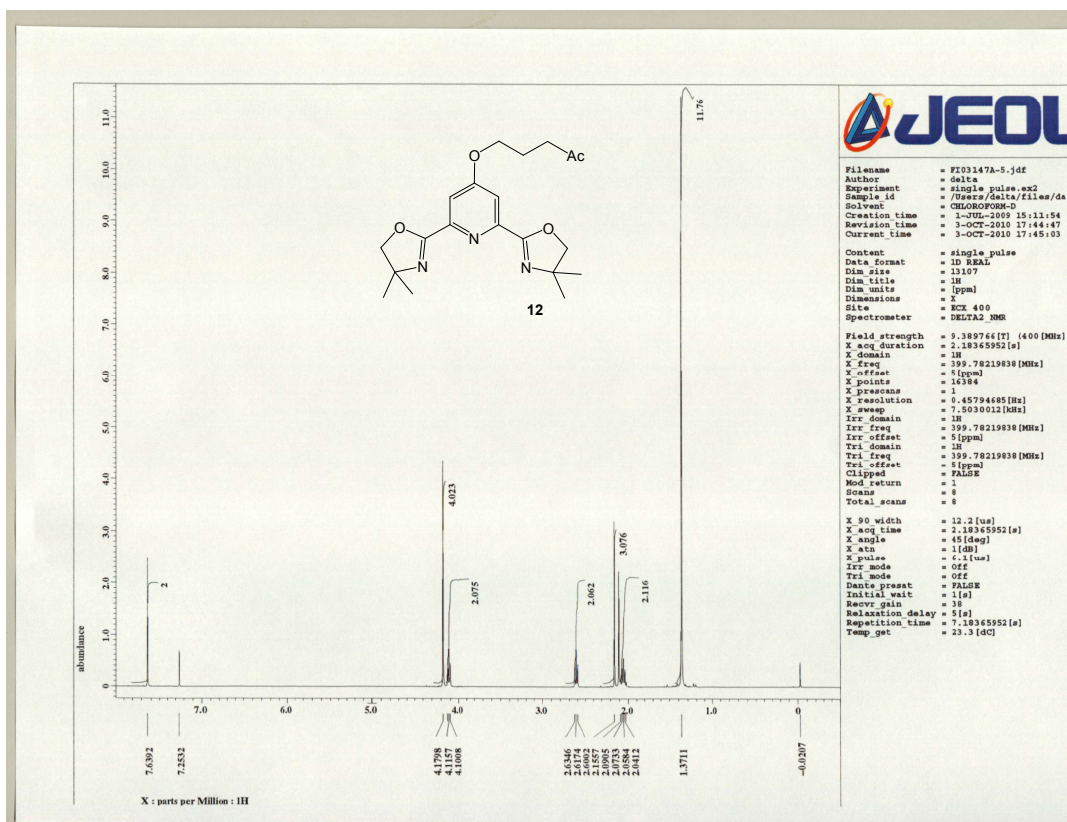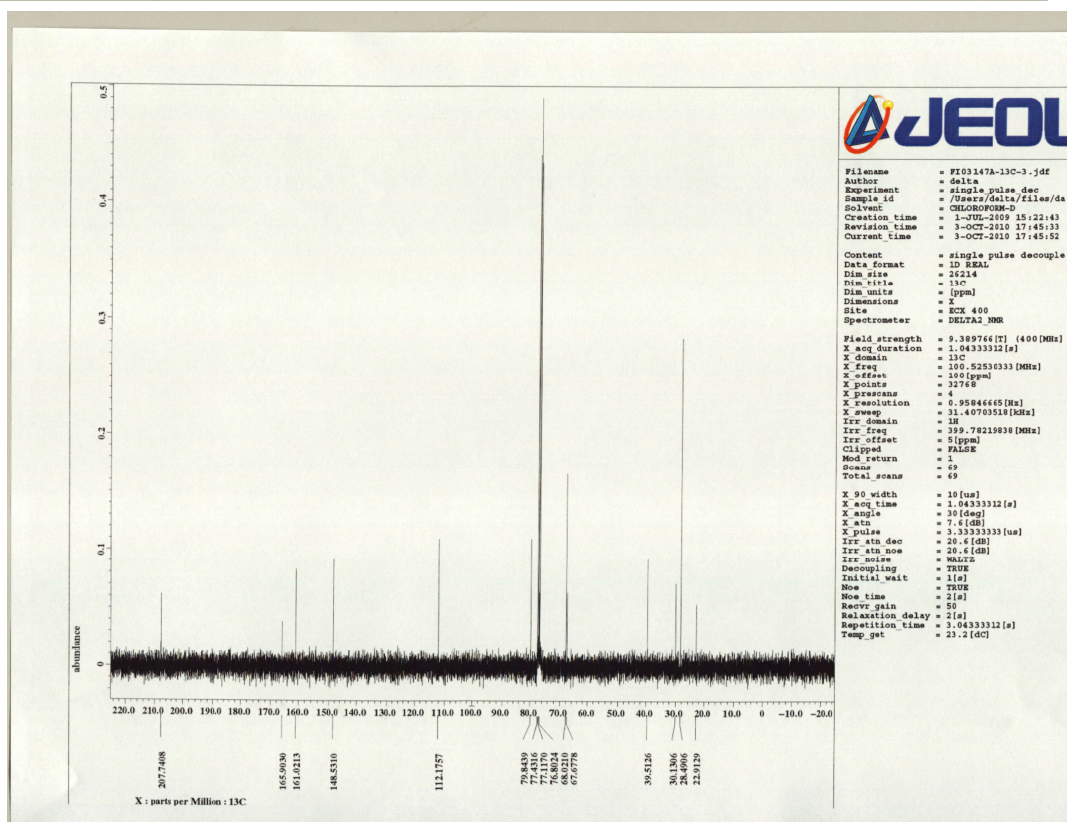

Supplement: c0ob00887g.pdf [file c0ob00887g.pdf]
